# Supplementary material
Source: MDPI journal article supplement (https://www.mdpi.com/2073-4433/14/5/882)
Supplement: s1 [file s1 › atmosphere-2365269-supplementary.pdf]

## Supplementary Materials:

Chunxiao Hao <sup>1,2</sup>, Yunshan Ge <sup>2</sup>, Jindong Liang <sup>3</sup>, Zhuoshi He <sup>2</sup>, Zhihui Huang <sup>2</sup> and Guangyu Dou <sup>2,\*</sup>

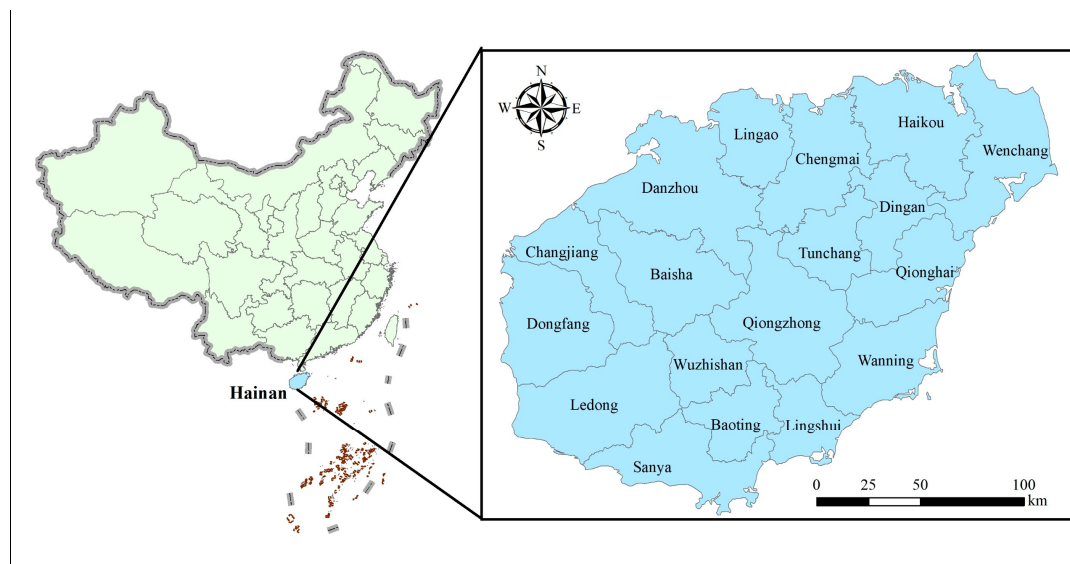

**Figure S1.** Hainan Island map.

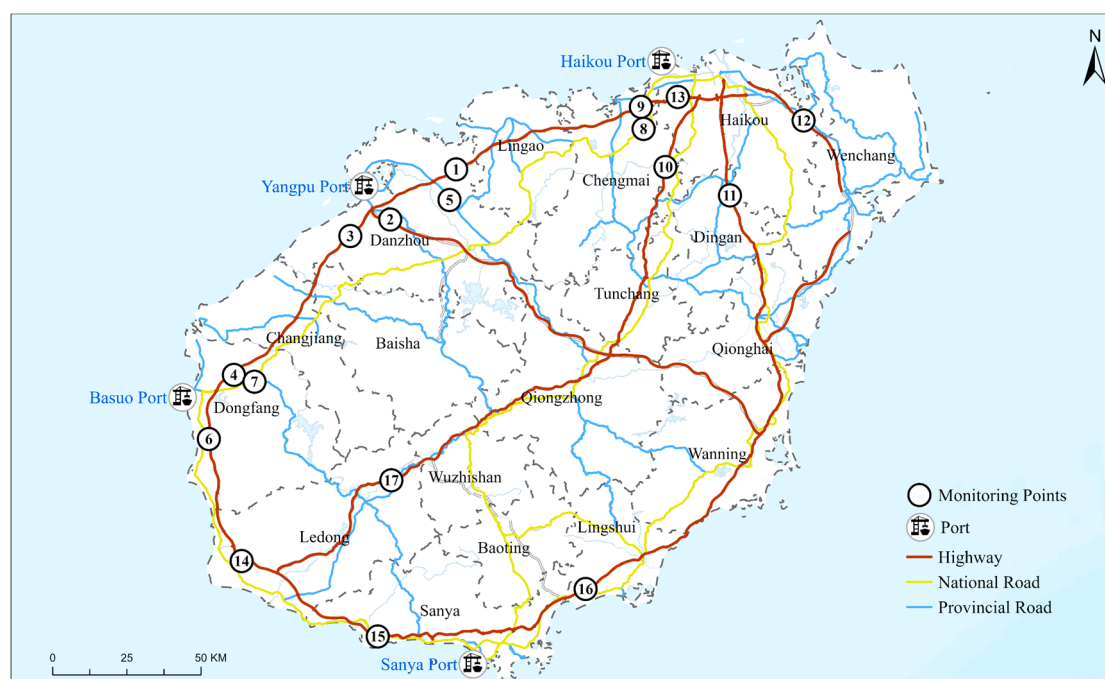

**Figure S2.** Hainan Island truck traffic flow monitoring points.

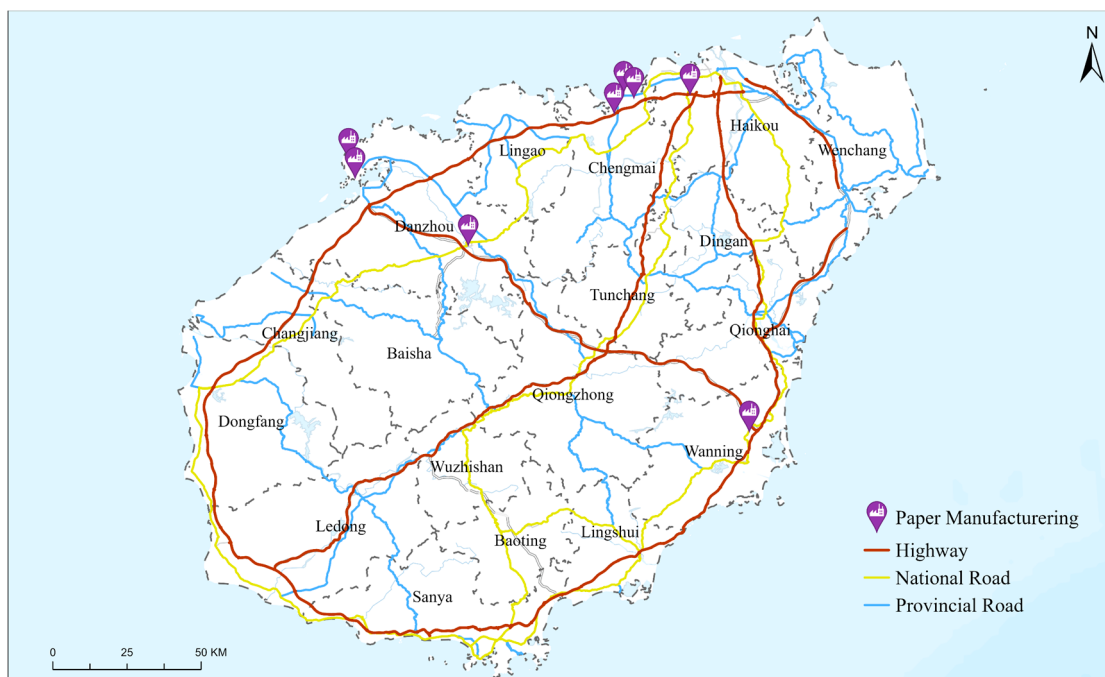

(a)

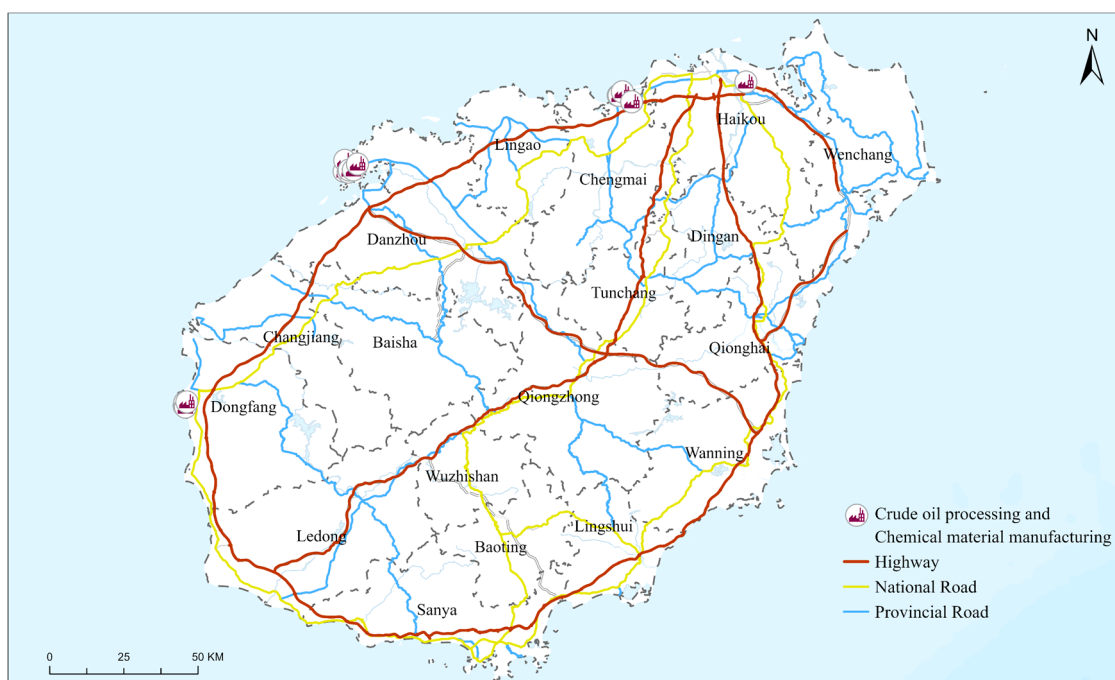

(b)

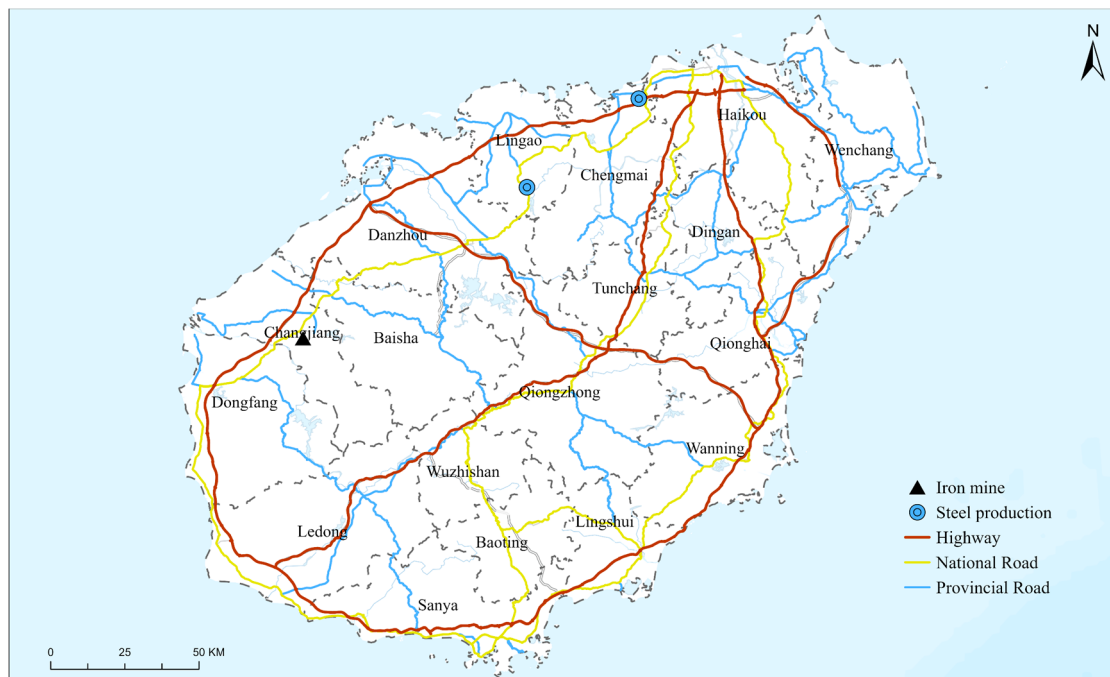

(c)

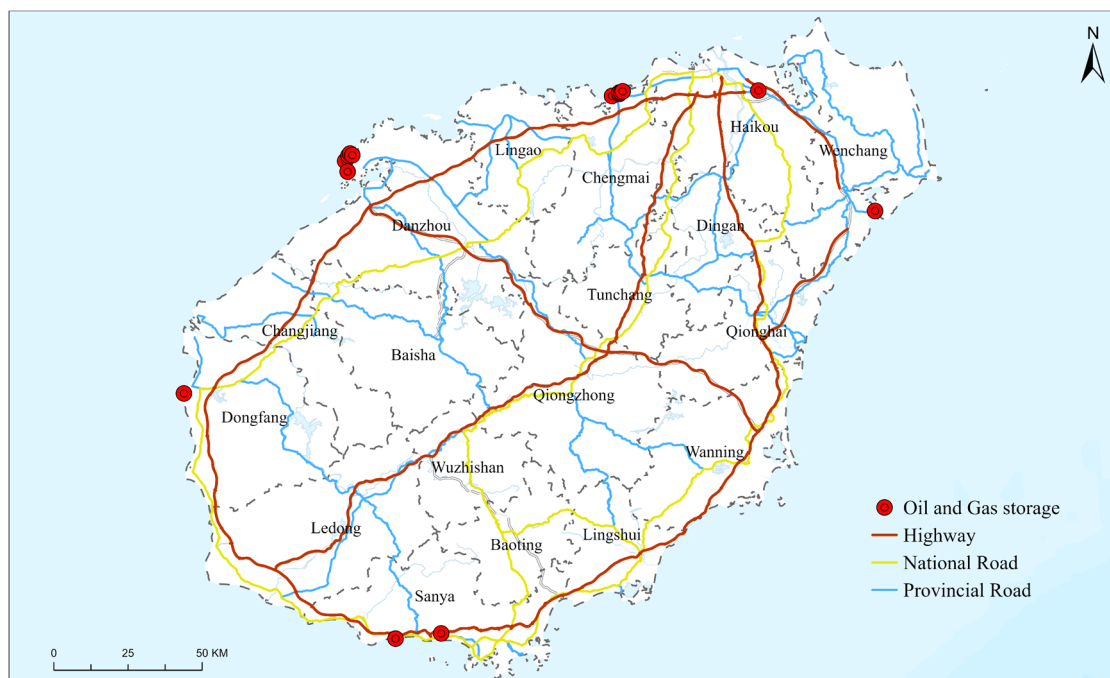

(d)

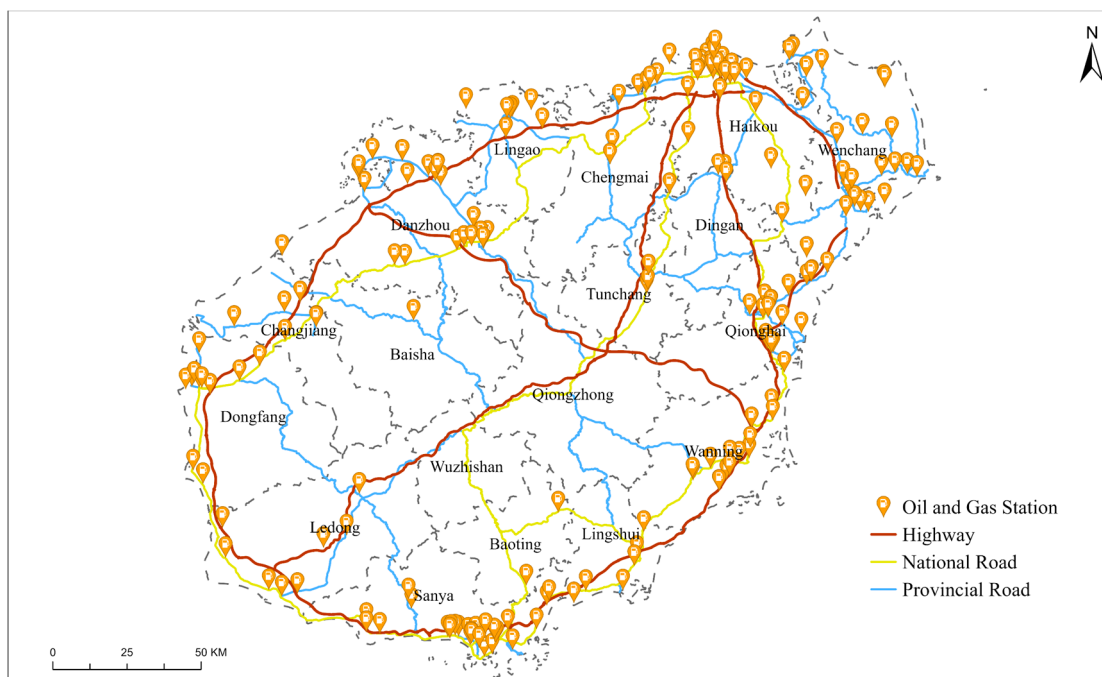

(e)

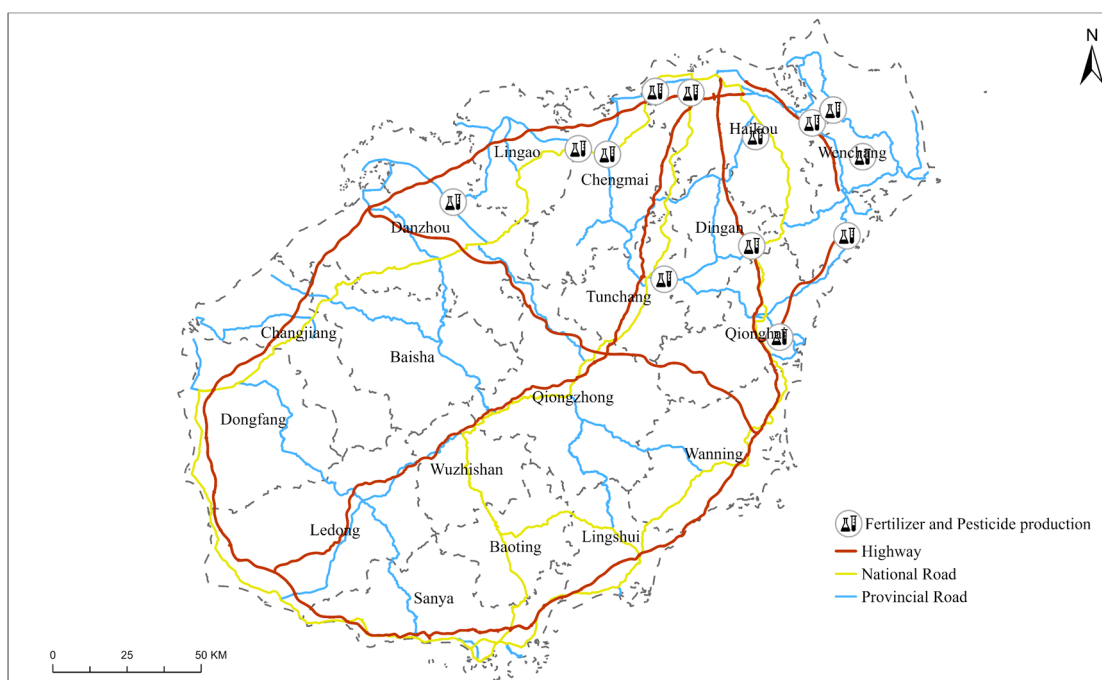

(f)

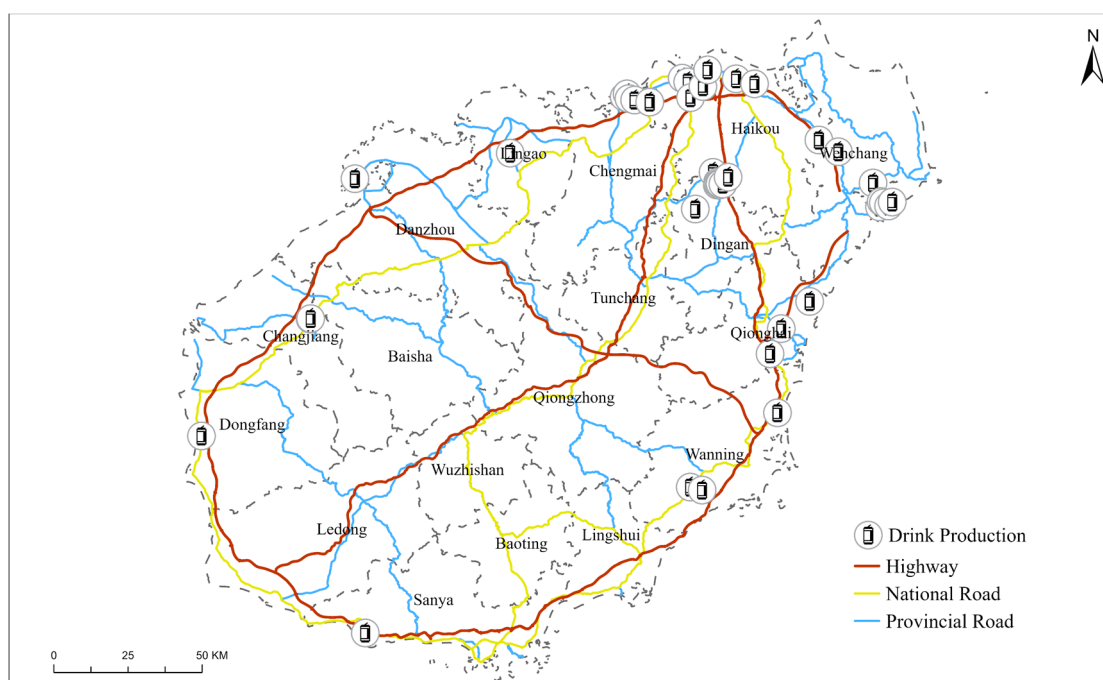

(g).

**Figure S3.** Layout of the main industrial enterprises in Hainan Island ((a): Paper and paper products manufacturing enterprises; (b): Crude oil processing and chemical raw material manufacturing enterprises; (c): Iron ore mining and steel rolling processing enterprises; (d): Oil and gas storage enterprises; (e): Oil and gas retail enterprises; (f): Fertilizer and pesticide production enterprises; (g): Beverage production enterprises).

**Table S1.** Main freight transportation status in Hainan Island.

| Category                           | Transportation Volume (10,000 tons) | Average Transportation Distance (km) | Cargo Turnover (10,000 ton-km) |
|------------------------------------|-------------------------------------|--------------------------------------|--------------------------------|
| Concrete                           | 2661                                | 15                                   | 39,915                         |
| Cement                             | 2313                                | 70                                   | 161,885                        |
| Agricultural and sideline products | 1558                                | 70                                   | 109,069                        |
| Raw ore of iron ore                | 314                                 | 60                                   | 18,814                         |
| Feed                               | 272                                 | 30                                   | 8166                           |
| Machine-made paper                 | 200                                 | 100                                  | 20,000                         |
| Grain                              | 480                                 | 70                                   | 33,613                         |
| Methanol                           | 135                                 | 10                                   | 1355                           |
| Synthetic ammonia                  | 77                                  | 10                                   | 771                            |
| Fertilizer and pesticide           | 61                                  | 100                                  | 6100                           |
| Soft drinks                        | 61                                  | 70                                   | 4270                           |
| Primary form plastics              | 31                                  | 30                                   | 918                            |
| Coal                               | 1279                                | 50                                   | 63,950                         |
| Steel                              | 406                                 | 50                                   | 20,298                         |
| Mining materials                   | 634                                 | 70                                   | 44,371                         |
| Non-metallic ores                  | 288                                 | 70                                   | 20,182                         |

---

|                                            |     |     |        |
|--------------------------------------------|-----|-----|--------|
| Machinery and electrical equipment         | 409 | 70  | 28,608 |
| Light industry and pharmaceutical products | 270 | 70  | 18,870 |
| Chemical raw materials and products        | 573 | 70  | 40,117 |
| Oil materials                              | 357 | 100 | 35,700 |

---
